# Supplementary material
Source: publisher site journal article supplement (https://www.dovepress.com/article/360114)
Supplement: Supplementary file 1 [file get_supplementary_file.php]

**Table S1** Questionnaire

**Part 1 Operation unit/ambulance data (filled by staff)**

1. Response code (RC)_______ 2. Response time ⃣ ⃣ : ⃣ ⃣ minutes(s)

**Part 2 Respondent’s personal data (filled by patient’s relative)**

*Explanation please place a check mark (/) in the answer box ( ⃣ ) that corresponds to your opinion (check only one)*

1. Gender ⃣ Male ⃣ Female

2. Age ______ year(s)

3. Ambulance call history ⃣ Yes ⃣ No

4. Relationship with patients  ⃣ Father/Mother ⃣ Husband/Wife  ⃣ Child  ⃣ Other____________

5. How long was the response time? ⃣ ⃣ : ⃣ ⃣ minutes(s)

**Part 3 Level affecting relative’s feeling in ambulance waiting (for patient’s relative)**

*** Note scoring criteria including**

*5 = highest 4 = high 3 = neutral 2 = low 1 = lowest*

*Explanation: please place a check mark (/) in the answer box that corresponds to your opinion (check only one)*

| **Issue** | **Relatives’ satisfaction regarding waiting times** | | | | |
| --- | --- | --- | --- | --- | --- |
|  | 5 = highest | 4 = high | 3 = neutral | 2 = low | 1 = lowest |
| Convenience and speed of the emergency call |  |  |  |  |  |
| Initial instructions and waiting time information |  |  |  |  |  |
| Continuous coordination from the dispatch center and ambulance |  |  |  |  |  |
| Appropriateness of the evaluation for providing emergency ambulance service |  |  |  |  |  |
| Neglected feeling |  |  |  |  |  |
